# Supplementary material
Source: Springer Nature journal article supplement (https://www.springermedizin.de/resource/supplementary/12990_2009_195_MOESM1_ESM.pdf/9612764)

A

SS

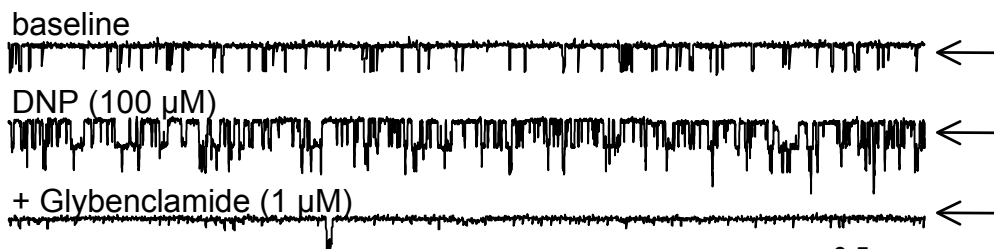

SNL

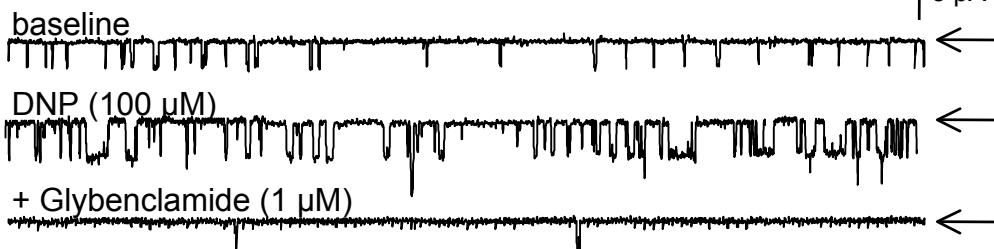

B

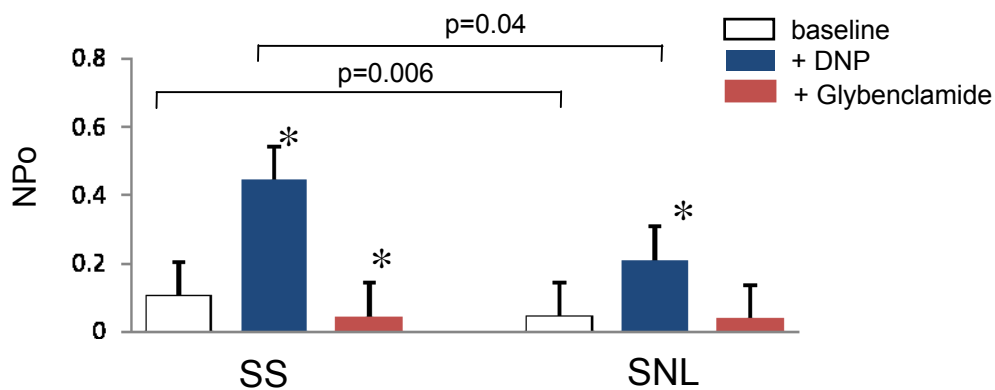

C

SS

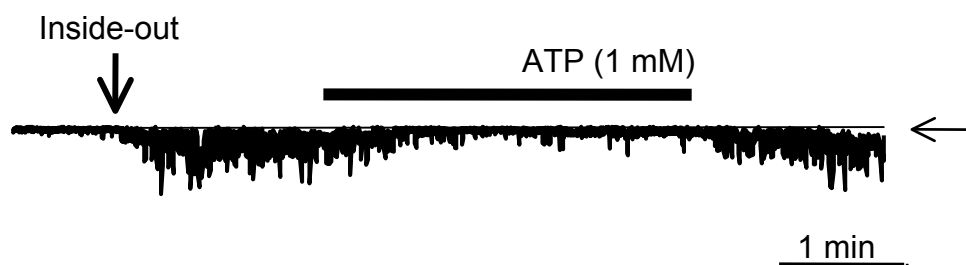

SNL

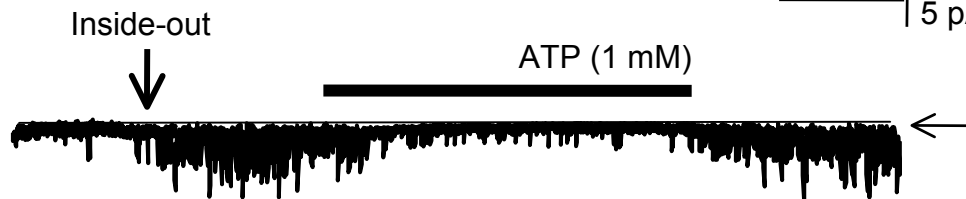

Supplement: MOESM1 [file 9612764]
